1 Metagenomics of the modern and historical human oral microbiome with phylogenetic  
2 studies on *Streptococcus mutans* and *Streptococcus sobrinus*

3 Mark Achtman and Zhemin Zhou

4 Warwick Medical School, University of Warwick, Coventry, UK

5 Orcid ID: MA, 0000-0001-6815-0070; ZZ, 0000-0001-9783-0366

6

7 **Subject Areas:**

8 methodology, metagenomics, population genomics, microbiology

9 **Keywords**

10 ancient DNA, dental plaque, dental calculus, saliva, genomic reconstruction, metagenomes

11 **Author for correspondence:**

12 Mark Achtman

13 e-mail: [m.achtman@warwick.ac.uk](mailto:m.achtman@warwick.ac.uk)

14

## 15 Abstract

16 We have recently developed bioinformatic tools to accurately assign metagenomic  
17 sequence reads to microbial taxa: SPARSE [1] for probabilistic, taxonomic classification of  
18 sequence reads, EToKi [2] for assembling and polishing genomes from short read sequences,  
19 and GrapeTree [3], a graphic visualizer of genetic distances between large numbers of  
20 genomes. Together, these methods support comparative analyses of genomes from ancient  
21 skeletons and modern humans [2,4]. Here we illustrate these capabilities with 784 samples  
22 from historical dental calculus, modern saliva and modern dental plaque. The analyses  
23 revealed 1591 microbial species within the oral microbiome. We anticipated that the oral  
24 complexes of Socransky *et al.* [5] would predominate among taxa whose frequencies  
25 differed by source. However, although some species discriminated between sources, we  
26 could not confirm the existence of the complexes. The results also illustrate further  
27 functionality of our pipelines with two species that are associated with dental caries,  
28 *Streptococcus mutans* and *Streptococcus sobrinus*. They were rare in historical dental  
29 calculus but common in modern plaque, and even more common in saliva. Reconstructed  
30 draft genomes of these two species from metagenomic samples in which they were  
31 abundant were combined with modern public genomes to provide a detailed overview of  
32 their core genomic diversity.

33

## 34 1.Introduction

35 Multiple research areas have undergone revolutionary changes in the last 10 years due to  
36 broad accessibility to high throughput DNA sequencing at reduced costs. These include the  
37 evolutionary biology of microbial pathogens based on metagenomic sequencing. Studies on  
38 *Mycobacterium tuberculosis* [6,7], *Mycobacterium leprae* [8,9], *Yersinia pestis* [2,10-14] and  
39 *Salmonella enterica* [4,15,16] have yielded important insights into the history of infectious  
40 diseases by combining modern and historical genomes. In principle, the same approach  
41 might also help to elucidate the evolutionary history of both commensal and pathogenic  
42 taxa within the human oral microbiome. Periodontitis and dental caries have likely afflicted  
43 humans since their origins [17-20]. They may now be amenable to population genetic  
44 analyses because a landmark publication by Adler *et al.* in 2013 [21] demonstrated that  
45 dental calculus (calcified dental plaque) from the teeth of skeletons that were up to 7500  
46 years old could contain relatively well preserved ancient bacterial DNA. That publication was  
47 based on 16S rRNA sequences, which are not informative about intra-species genetic  
48 diversity. However, subsequent shotgun sequencing from modern and ancient dental  
49 calculus [22-24] has demonstrated that it should be possible to reconstruct genomic  
50 sequences that span millennia of human history from multiple individual species within the  
51 oral microbiome.

52 Reconstructing evolutionary history from the oral microbiome faces numerous technical  
53 challenges. Our understanding of the historical evolutionary biology of bacterial pathogens  
54 benefitted greatly from existing frameworks for the modern population genomic structure  
55 of those bacteria [25-27]. However, extensive bacterial population genetic analyses are  
56 largely lacking for the modern oral microbiome. The existing literature largely focuses on  
57 taxonomic binning into a traditional subset of 40 cultivatable species from periodontitis  
58 [28], whose sub-species population structure have not yet been adequately addressed at  
59 the genomic level. Instead, most analyses have focused on the “oral complexes”, which  
60 consist of groups of multiple species whose co-occurrence is statistically associated with  
61 periodontitis [5].

62 A second barrier to reconstructing evolution history are the limits of the currently existing  
63 bioinformatic tools. The genetic diversity of metagenomic sequences is usually classified by  
64 binning the microbial sequence reads into taxonomic units. Taxonomic assignments can be  
65 performed by the *de novo* assembly of metagenomic reads into MAGs (metagenomic  
66 assembled genomes) [29,30], or by assigning individual sequence reads to existing reference  
67 genomes. However most current metagenomic classifiers rely on the public genomes in  
68 NCBI, whose composition is subject to an extreme sample bias and which represents a  
69 preponderance of genomes from pathogenic bacteria [31]. Furthermore, shotgun  
70 metagenomes often include DNA from environmental sources, which include multiple  
71 micro-organisms that have never been cultivated, and may belong to unknown or poorly  
72 classified microbial taxa whose abundance is not reflected by existing databases. Recent  
73 evaluations have also demonstrated that current taxonomic classifiers either lack sufficient  
74 sensitivity for species-level assignments, or suffer from false positives, and that they  
75 overestimate the number of species in the metagenome [31-33]. Both tendencies are

76 especially problematic for the identification of microbial species which are only present at  
77 low-abundance, e. g. detecting pathogens in ancient metagenomic samples.

78 Over the last few years we have developed a series of tools which can facilitate comparative  
79 metagenomics of modern and ancient samples. SPARSE, a novel taxonomic classifier for  
80 short read sequences in metagenome, was designed to provide accurate taxonomic  
81 assignments of metagenomic reads [1]. SPARSE accounts for the existing bias in reference  
82 databases [31,34] by sorting all complete genomes of Bacteria, Archaea, Viruses and  
83 Protozoa in RefSeq into sequence similarity-based hierarchical clusters with a cut-off of 99%  
84 average nucleotide identity (ANI99%). It subsequently extracts a representative subset from  
85 those clusters, consisting of one genome per ANI95% cluster because ANI95% is a common  
86 cutoff for individual bacterial species [35,36]. SPARSE then assigns metagenomic sequence  
87 reads to these clusters by using Minimap2 [37]. However, such alignments are likely to be  
88 inaccurate when they are widely dispersed across multiple ANI95% clusters because such  
89 wide dispersion reflects either ultra-conserved elements of uncertain specificity or a high  
90 probability of homoplasies due to horizontal gene transfer. SPARSE therefore reduces such  
91 unreliable alignments by negative weighting of widely dispersed sequences reads. The  
92 remaining metagenomic reads are then assigned to unique species-level clusters on the  
93 basis of a probabilistic model, and labelled according to the taxonomic labels and  
94 pathogenic potential of the genomes within those clusters. Our methodological  
95 comparisons demonstrated that SPARSE has greater precision and sensitivity with simulated  
96 metagenomic data than 10 other taxonomic classifiers, and yielded more correct  
97 identifications of pathogen reads within metagenomes of ancient DNA than five other  
98 methods [1]. SPARSE is also suitable for classifying reads from metagenomes from modern  
99 samples, and can extract reads from any ANI95% taxon of interest.

100 SPARSE assigns sequence reads to taxa, but does not create genomic assemblies from the  
101 selected metagenomic reads. That task is performed by EToKi, a stand-alone package of  
102 useful pipelines that are used by Enterobase [2] for manipulations of 100,000s of microbial  
103 genomes. EToKi is used to merge overlapping paired-end reads, remove low quality bases  
104 and trim adapter sequences. It then excludes sequence reads with greater sequence  
105 similarities to genomes from a related but distinct out-group than to an in-group of  
106 genomes from the target taxon of interest. EToKi then masks all nucleotides in an  
107 appropriate reference genome, and creates a pseudo-MAG by unmasking nucleotides with  
108 sufficient coverage among the reads that have passed the in-group/out-group comparisons.  
109 Finally, EToKi can create a SNP matrix from pseudo-MAGs plus additional draft genomes,  
110 and generate a Maximum-Likelihood phylogeny (RAxML 8.2 [38]), which can be visualized  
111 together with its metadata in GrapeTree [3].

112 Here we demonstrate the power of this combination of pipelines by examination of the  
113 metagenomic diversity of the human oral microbiome from a large number of historical and  
114 modern samples from diverse geographic sources. We address the question of which  
115 microbial taxa are uniformly present in human saliva, dental plaque and dental calculus, and  
116 which are specific to individual niches. We test the associations of oral taxa within the  
117 traditional oral complexes, and conclude that their very existence needs re-examination.

118 Finally, we examine the population genomic structures of *Streptococcus mutans* and  
119 *Streptococcus sobrinus*, which are associated with dental caries in some human populations  
120 [39-41].

121

## 122 2. Results

### 123 (a) SPARSE analysis of oral metagenomes

124 We identified 17 public archives containing 1,016 sets of metagenomic sequences (table 1)  
125 from 791 oral samples from a variety of global sources which had been obtained from  
126 modern human saliva, modern human dental plaque or historical dental calculus (electronic  
127 supplementary material, table S1). Individual sequence reads from those metagenomes  
128 were assigned to taxa with SPARSE. The assignments were made according to an upgraded  
129 database of 20,054 genomes of Bacteria, Archaea or Viruses, one genome per ANI95%  
130 cluster among 101,680 genomes in the NCBI RefSeq databases in May 2018. Seven  
131 metagenomes (ancient dental calculus: 5; modern saliva: 2) lacked bacterial reads from the  
132 oral microbiome (electronic supplementary material, table S2). These seven metagenomes  
133 were ignored for further analyses, leaving assignments to 1,591 microbial taxa from 1,009  
134 metagenomes (784 samples) (table 2). Table S3 in electronic supplementary material  
135 reports the percentage assignment of the reads in each sample to each of the 1,591 taxa,  
136 except for assignments with a sequence read frequency of <0.0001%, which are reported as  
137 0%. Table S3 includes a column identifying assignments to the oral microbial complexes  
138 defined by Socransky *et al.* [5]. SPARSE also identified 152 samples containing Archaea from  
139 four species, 214 samples containing at least one of four human viruses and 146 samples  
140 containing at least one of 12 bacteriophages (table 3). This dataset may represent the  
141 currently broadest sample of the oral microbiome from global sources and over time.

### 142 (b) Comparisons of microbiomes from saliva, plaque and historical dental calculus

143 We tested whether individual oral taxa were particularly enriched or depleted according to  
144 source with multiple quantitative approaches, including UMAP (Uniform Manifold  
145 Approximation and Projection), principal component analysis (PCA), and hierarchical  
146 clustering.

147 UMAP is a recently described, high performance algorithm for dimensional reduction of  
148 diversity within large amounts of data by non-linear multidimensional clustering [42]. A  
149 UMAP plot of the taxon abundances in each sample showed three clusters (figure 1A). The  
150 three clusters are totally discrete (electronic supplementary material, figure S1A) according  
151 to a machine learning approach, optimal k-mean clustering of the first three components  
152 from the UMAP analysis). With minor exceptions, the three UMAP clusters were also  
153 predominantly associated with source, with one cluster for taxa from modern saliva, a  
154 second one for taxa from modern dental calculus and the third for taxa from ancient dental  
155 calculus (figure 1A). Similar results were obtained with a classical principal component  
156 analysis (PCA), except that the clusters were not as clearly distinguished as with UMAP, and  
157 the proportion of exceptions was greater (electronic supplementary material, figure S1B).  
158 The assignments of source affiliations to cluster were also largely consistent between UMAP  
159 and PCA, with occasional exceptions (electronic supplementary material, figure S1C).

160 For the third approach, we calculated the Euclidean p-distances between each pair of  
161 samples, and subjected them to hierarchical clustering by the neighbor-joining algorithm  
162 with the results shown in figure 1B. Hierarchical clustering also largely separated the  
163 samples by source with only few exceptions. Samples from modern saliva formed one large

164 cluster. Samples from modern dental plaque formed two related but discrete sub-clusters,  
165 one of which included a sub-sub cluster of samples from historical dental calculus. These  
166 clusters also largely corresponded to the clusters found by k-mean clustering of UMAP data.

167 Thus, three primary and distinct clusters were consistently identified by three independent  
168 methods from the quantitative numbers of reads in individual microbial taxa. The three  
169 clusters were largely source-specific for modern saliva, modern plaque and historical dental  
170 calculus. This finding predicts that the microbiomes from these three sources contain  
171 source-specific taxa.

### 172 (c) Source-specific taxa

173 We attempted to identify the most important bacterial taxa for the observed clustering by  
174 sample source with a second, powerful machine learning approach. A supervised Support  
175 Vector Machine (SVM) [43] classification was used to identify the most optimal of 300 SVM  
176 model variants, and the 40 most discriminating ANI95% taxa according to that model are  
177 shown in figure 2, together with mini-histograms that summarize the relative abundance of  
178 sequences by source. As predicted from the discrete clustering described above, multiple  
179 taxa were dramatically more prominent in samples from one source than from either of the  
180 two other sources. The results also show that the most prominent sample source varied  
181 with the taxon (figure 2).

182 Eleven of the 40 most discriminatory taxa belonged to the oral complexes that are  
183 associated with periodontitis according to Socransky *et al.* [5]. Seven species from oral  
184 complexes (*Veillonella parvula*, *Fusobacterium nucleatum*, *Capnocytophaga gingivalis*,  
185 *Streptococcus gordonii*, *Actinomyces naeslundii*, *Actinomyces viscosus*, and *Capnocytophaga*  
186 *sputigena*) were most abundant in modern plaque and two other species (*Streptococcus*  
187 *sanguinis*, *Tannerella forsythia*) were most abundant in historical dental calculus. The yellow  
188 complex includes *Streptococcus mitis*, which encompasses over 50 distinct ANI95% clusters  
189 [44]. Two of these ANI95% clusters, designated *S. mitis* s8897 (ANI95% cluster in electronic  
190 supplementary material, table S3; MG\_43 in [44]) and *S. mitis* s126097 (MG\_56) were  
191 included among the 40 most discriminatory taxa, and each of them was more frequent in  
192 saliva than in dental plaque or dental calculus.

193 Seventeen other taxa that were assigned to an oral complex by Socransky *et al.* [5] are not  
194 included in figure 2 because they were not among the 40 most discriminatory taxa. We  
195 therefore examined the relative abundances of all 28 taxa from oral complexes in greater  
196 detail (figure 3). Three of the four taxa in the Blue and Purple Complexes are very abundant  
197 in oral metagenomes, and all four are preferentially found in modern plaque. However, the  
198 other oral complexes are heterogeneous in their patterns of relative abundances. For  
199 example, within the Red complex, both *T. forsythia* and *Treponema denticola* were most  
200 frequently found in historical dental calculus but *Porphyromonas gingivalis* is most frequent  
201 in modern plaque, and is generally much less abundant. Similar intra-complex discrepancies  
202 were found for the Orange, Yellow, and Green Complexes. These inconsistent frequencies  
203 by source raise questions about the consistency of the compositions of those complexes in  
204 individual samples



205 (d) Existence of “oral complexes”?

206 Socransky *et al.* [5] initially treated the oral complexes as a hypothesis. However, they have  
207 now attained the status of accepted wisdom, and even play a prominent role in routine  
208 laboratory investigations and treatment of periodontitis. The oral complexes included 28  
209 cultivated bacterial species, whose presence or absence was determined by DNA  
210 hybridization against a small number of probes. This technology is now outdated; the  
211 number of known oral taxa has increased dramatically; and the data presented here are for  
212 relative abundance rather than presence or absence. However even after weighting for  
213 genome size, we do not find a close correspondence between the frequencies of cells in  
214 sub-gingival dental plaque measured by Socransky [28] and the results presented here  
215 (Supplementary Text). We therefore re-examined the strengths of association with the oral  
216 complexes from the data presented here according to similar criteria and similar methods as  
217 those used in the Socransky *et al.* 1998 publication [5].

218 The original assignments to the oral complexes depended strongly on results from  
219 hierarchical clustering of the pairwise concordance between species for presence or  
220 absence in individual samples. The tree in figure 4 shows neighbor-joining clustering of the  
221 common microbial taxa in our dataset by the similarities of their abundances over all  
222 samples in our dataset according to SPARSE. This tree contradicts the original composition  
223 of the oral complexes: the four areas of the tree where oral complex taxa are clustered each  
224 contain representatives from multiple complexes, and none of those four clusters  
225 corresponds to the original compositions proposed by Socransky *et al.* [5].

226 It seemed possible that the discrepancies between figure 4 and the original compositions of  
227 the oral complexes might reflect the fact that this study identified many additional taxa,  
228 some of which were as common as those used to define the oral complexes (Supplementary  
229 Text). We therefore performed cluster analyses of our current data for the original set of 31  
230 cultivatable bacterial species examined by Socransky *et al.* [5]. We compared the neighbor-  
231 joining algorithm used here with the less powerful, agglomerative clustering method  
232 (UPGMA, Unweighted Pair Group Method with Arithmetic Mean) that had been used by  
233 Socransky *et al.* We also compared the abundances across all samples with abundances in  
234 plaque, which was the primary source for bacteria tested by Socransky *et al.* The results  
235 (electronic supplementary material, figure S3) show dramatic inconsistencies between  
236 independent trees in regard to the clustering of the oral complex bacteria. For example, *T.*  
237 *forsythia*, *T. denticola* and *P. gingivalis* of the Red Complex cluster together (and also with *C.*  
238 *rectus*) in electronic supplementary material, figures S3A,C,F,G. However, *T. denticola* and *T.*  
239 *forsythia* are separated from *P. gingivalis* in the four other graphs in electronic  
240 supplementary material, figure S3. And none of the three cluster together with each other  
241 in electronic supplementary material, figure S3E. Similar, or even greater, discrepancies are  
242 visible for the other oral complexes in electronic supplementary material, figure S3.  
243 Inconsistencies in clustering patterns across minor differences in sampling and clustering  
244 algorithms raise severe doubts about the very existence of the oral complexes as defined by  
245 Socransky *et al.* [5].



246 (e) Numbers of taxa per source

247 The rarefaction curves in figure 5A provide a breakdown of taxa by sample source as  
248 additional samples are tested. SPARSE detected 1591 microbial taxa over all 784  
249 metagenomic samples: 1,389 from modern saliva; 842 from modern plaque and 696 from  
250 historical calculus. These estimates will increase as additional samples are added, but at  
251 increasingly slower rates because the rarefaction curves seem to be reaching a plateau,  
252 except for historical dental calculus where the fewest samples have been evaluated until  
253 now.

254 The median numbers of taxa per sample range from 177 (historical dental calculus) to 288  
255 (modern saliva), and were much smaller than the total numbers. These median values  
256 reflect a bimodal distribution for numbers of taxa per sample (figure 5B), wherein a few  
257 samples had jackpots of large numbers of taxa but all other samples had only few.

258 The analyses described above focused on differences in taxon composition by source.  
259 However, the Venn diagram in figure 5C shows that 447 taxa were common to all three  
260 sources, even if their relative abundances varied. Modern plaque yielded only 34 taxa which  
261 were not found in either historical dental calculus or modern saliva. More source-specific  
262 taxa were found in historical dental calculus, which may possibly reflect some  
263 contamination with environmental material. Alternatively, some taxa may be absent in  
264 modern dental plaque because historical lineages have become extinct [4]. Saliva yielded  
265 504 unique taxa, some of which might be transient, and do not persist long enough to be  
266 incorporated into plaque.

267 (f) Population genomics of organisms associated with dental caries

268 The microbiome associated with early stages of dental caries is an unresolved topic that  
269 remains under active investigation [40,45-47]. However, it is generally accepted that  
270 *Streptococcus mutans* and *Streptococcus sobrinus* are routinely associated with caries [48].  
271 Our data confirm that reads belonging to these two taxa are abundant in modern dental  
272 plaque, and also show that they are even more abundant in modern saliva (figure 6A,C).  
273 However, there was no significant correlation between the relative frequencies of these  
274 species across multiple metagenomes (electronic supplementary material, figure S9). Prior  
275 analyses based on 16S RNA OTUs indicated that *S. mutans* was extremely rare in historical  
276 dental calculus, and argued that this increase was caused by the introduction of high levels  
277 of sugar to human diets in industrialized societies in the last 200 years [21]. Our data show  
278 that *S. sobrinus* was undetectable in historical samples (frequency of <0.0001% of reads or  
279 <10 reads per metagenome) (figure 6C). *S. mutans* was also undetectable in most of these  
280 samples, but up to 0.04% of all reads in 10 historical samples spanning the last 1500 years  
281 were assigned to *S. mutans* (figure 6A), in accordance with archaeological findings that  
282 dental caries has been common in multiple eras over the last 10,000 years [17]. The few  
283 reads from historical samples that were assigned to *S. mutans* showed increased  
284 deamination at their 5'-ends when tested by MapDamage2 [49] (electronic supplementary  
285 material, figure S4), confirming that they were truly from ancient DNA.

286 We exploited the high frequency of sequence reads from these two *Streptococcus* species in  
287 modern dental plaque and saliva to illustrate how SPARSE and EToKi can be used to extract

288 pseudo-MAGs from metagenomic sequence reads, and combine them with genomes  
289 sequenced from cultivated bacteria (Methods). These procedures resulted in a total of 31  
290 pseudo-MAGs for *S. mutans* and 15 pseudo-MAGs for *S. sobrinus* in which over 70% of the  
291 reference genome had been unmasked (figures 6E,F, electronic supplementary material,  
292 table S6). Most of these pseudo-MAGs were from Chinese samples [50]. The pseudo-MAGs  
293 were combined with genomes from cultivated bacteria of the same species from Brazil, the  
294 U.S. and the U.K. as well as other countries (table 2) and Maximum Likelihood (ML)  
295 phylogenies of non-repetitive SNPs (figure 7) were created with EToKi (Methods).

296 The ML phylogenies of the two species showed interesting differences. All 13 Chinese  
297 pseudo-MAGs clustered together within the *S. sobrinus* ML tree (figure 7B), whereas almost  
298 all the other 44 bacterial genomes from Brazil and elsewhere clustered distantly. In contrast,  
299 in the *S. mutans* tree (figure 7A), 20 Chinese pseudo-MAGs did not show any obvious  
300 phylogeographic specificities, and were inter-dispersed among 196 bacterial genomes from  
301 multiple geographic locations. Similar conclusions about a lack of phylogeographic  
302 specificity were previously reached by Cornejo *et al.* [51] on a subset of 57 of these *S.*  
303 *mutans* genomes.

### 304 3. Discussion

305 Several years ago, we accidentally became interested in comparing historical and modern  
306 genomes reconstructed from metagenomic short read sequences with draft genomes  
307 assembled from high throughput sequencing of cultivated bacteria. Our initial efforts  
308 involved the deployment of individual bioinformatic tools, comparisons of multiple publicly  
309 available algorithms, and compilation of draft genomes from publicly available sequence  
310 read archives of short read sequences [7]. In parallel, we were also involved in developing  
311 EnteroBase, a compendium of 100,000s of draft genome assemblies from multiple genera  
312 that can cause enteric diseases in humans, including *Salmonella* [2,27]. These two projects  
313 were synergistic for elucidating the evolutionary history of *Salmonella enterica* based on  
314 metagenomic sequences from 800-year old bones, teeth and dental calculus [4]. In that  
315 case, sequence reads from *S. enterica* were found in teeth and bone, but not in dental  
316 calculus. Our attempts to examine further samples of dental calculus quickly demonstrated  
317 that optimized pipelines were needed because manual analyses were too time-intensive.  
318 However, none of the existing tools were both reliable and sufficiently sensitive for  
319 assigning sequence reads from historical metagenomes to the tree of microbial life. We  
320 therefore took a step back, and developed SPARSE [1] to satisfy our requirements. SPARSE  
321 replaces the current reference databases, which are strongly biased to multiple, closely  
322 related genomes from bacterial pathogens, by a representative subset consisting of one  
323 genome per ANI95% hierarchical cluster within RefSeq, and assigns sequence reads to these  
324 clusters using a probabilistic model. That model penalizes non-specific mappings of reads,  
325 and hence reduces false-positive assignments. SPARSE was more reliable than multiple  
326 other taxonomic classifiers, and both more sensitive and more reliable for identifying low  
327 numbers of reads from ancient metagenomes than multiple other pipelines [1]. In parallel,  
328 we expanded the capacities of EToKi [2], an efficient backend pipeline for genomic  
329 manipulations, such that it can accurately identify individual sequence reads sieved through

330 SPARSE that are more similar to an in-group of reference genomes from the target species  
331 than to an out-group of genomes from a closely related, but distinct taxon. Those reads are  
332 then used to unmask nucleotides in a reference genome and generate a pseudo-MAG for  
333 SNP-based maximum likelihood phylogenies. Finally, we developed GrapeTree [3], which  
334 facilitates the graphic visualization and manipulation of phylogenetic trees based on large  
335 numbers of genomes. Here we demonstrate how to combine all three tools in order to  
336 obtain an overview of the microbial flora in samples from human oral saliva, modern dental  
337 plaque and historical dental calculus. We also reconstructed genomes of two taxa present at  
338 moderate concentrations within the oral microbiome, and compare them with conventional  
339 draft genomes. The experimental procedures for processing 1016 metagenomes consisted  
340 of running SPARSE in the background for 2 months (~100,000 CPU hours). The pipelines  
341 described here permitted all other procedures and evaluations described here to be  
342 completed in less than two weeks.

343 Our traditional understanding of oral ecology is largely based on taxonomic assignments of  
344 cultivatable bacteria, often performed by checkerboard DNA-DNA hybridization [28].  
345 Currently, 756 species have been cultivated from the human oral cavity and respiratory tract  
346 [52]. A subset of 40 are used for checkerboard DNA-DNA hybridization [28], of which 28 were  
347 used to define the oral complexes that were thought to be of importance for periodontitis  
348 [5]. Our comparisons of those data with the results from the metagenomic analyses  
349 presented here shows that the frequencies of individual taxa determined by the  
350 checkerboard assay were inconsistent with the frequencies determined by our  
351 metagenomic analyses (electronic supplementary material, figures S5 and S6). The  
352 checkerboard assays also lacked 17 common taxa from dental plaque and dental calculus  
353 that were found by metagenomic analyses. These results are not unexpected because our  
354 metagenomic analyses included saliva samples as well as ancient dental calculus, and  
355 identified 1591 taxa, many of which have not been cultivated. Furthermore, it is now well  
356 established that the frequencies of certain supposed members of the oral complexes differ  
357 very dramatically with geographical source [53]. However, we had anticipated that we might  
358 be able to expand the compositions of the oral complexes to include previously uncultivated  
359 organisms. Instead, we were unable to reliably identify their very existence (figure 4)  
360 because clustering of taxa was affected by minor changes in choice of samples and choice of  
361 clustering algorithm (electronic supplementary material, figure S3). We therefore conclude  
362 that the existence and composition of the oral complexes needs independent verification by  
363 modern techniques and new samples.

364 The data presented here provide an unprecedented comparative overview of the relative  
365 proportions of the predominant taxa in public available metagenomes from the modern and  
366 historical oral microbiome. Figure 2 identifies 15 taxa, which are particularly common in  
367 historical calculus, 13 others that are preferentially found in modern dental plaque and 11  
368 that seem to be specific for saliva. These associations with a particular source in the oral  
369 cavity might be used to identify currently undefined ecological complexes of oral taxa that  
370 share a common niche. However, species-level OTUs are likely to be conglomerates of  
371 multiple microbial populations, each of which may inhabit a somewhat different ecology.  
372 For some organisms such as *Salmonella* or *Escherichia*, efforts are currently underway to

373 develop hierarchical clustering of such populations in order to categorize their ecological  
374 and pathogenic differentiation [2]. A step in this direction for the oral microbiome is the  
375 recognition of ANI95% clusters s8897 and s126097, both of which were preferentially found  
376 in saliva. A large study of all streptococci [44] identified multiple other ANI95% clusters  
377 within *S. mitis* but their preferential location in the oral cavity have not yet been addressed.  
378 Indeed, little is yet known about the sub-species population structure of almost all of the  
379 taxa identified here.

380 Our more detailed investigation of *S. mutans* and *S. sobrinus* may represent a forerunner of  
381 future studies on sub-species ecological differences within the oral microbiome. *S. mutans*  
382 and *S. sobrinus* are commonly associated with dental caries, and may play a causal role in  
383 that disease [48]. However, once again these taxa were more common in saliva than in  
384 dental plaque (figure 6). We chose *S. mutans* and *S. sobrinus* for more detailed analysis  
385 because sufficient reads were found in multiple metagenomes from modern samples to  
386 allow the partial reconstruction of multiple genome sequences (pseudo-MAGs). In addition,  
387 multiple draft genomes from cultivated bacteria existed in the public domain which were  
388 available for genomic comparisons. We were also intrigued by the claim that *S. mutans* was  
389 rare in historical plaque [21]. Our data support that claim, and we found only few historical  
390 samples of dental calculus that contained any reads of *S. mutans*, and none with *S. sobrinus*.  
391 Our data also support prior conclusions of a lack of phylogeographic differentiation within *S.*  
392 *mutans* [51]. However, although the data are still somewhat limited, *S. sobrinus* from China  
393 tend to cluster distinctly from genomes from Brazil (figure 7). Distinct clustering might  
394 reflect phylogeographical signals but other causes of clustering cannot currently be  
395 excluded because the Chinese genomes were pseudo-MAGs reconstructed from  
396 metagenomes from dental plaque and saliva while the Brazil genomes were from bacteria  
397 cultivated from dental plaque. Additional genomes of *S. sobrinus* from other geographical  
398 areas would be needed to determine whether the apparent phylogeographical trends are  
399 robust. Such analyses could also be facilitated by creating an Enterobase for *Streptococcus*,  
400 which could be done relatively easily [44] if there were interested curators and sufficient  
401 interest in the *Streptococcus* community.

402 In summary, we illustrate the use of a variety of reliable, high throughput tools for  
403 determining microbial diversity within metagenomic data, and for extracting microbial  
404 genomes from metagenomes. We illustrate these tools with metagenomes from both  
405 modern and historical samples, and release all the data and methods for further use by  
406 others.

407

## 408 4. Methods

### 409 (a) SPARSE database update

410 In its original incarnation in August 2017 [1], SPARSE used MASH [54] to assign 101,680  
411 genomes from the NCBI RefSeq database to 28,732 ANI99% clusters of genomes. By May  
412 2018, 21,540 additional genomes had been added to NCBI RefSeq. These were merged into  
413 the existing database in the same manner as previously, by merging that genome into an  
414 existing ANI99% cluster or by creating a new cluster containing one genome if the ANI to all  
415 existing clusters was less than 99%. An ANI99% representative microbial database was  
416 generated which contained one representative genome for each of the 32,378 ANI99%  
417 clusters containing Bacteria, Archaea or Viruses plus a human reference genome (Genome  
418 Reference Consortium Human Build 38) such that reads from human DNA could also be  
419 called. All the representative genomes were assigned to a superset of 20,054 ANI95%  
420 clusters, and this was used for species assignments and genomic extractions as described  
421 [1].

### 422 (b) SPARSE analyses.

423 'EToKi prepare' was used to collapse paired-end reads and trim all sequence reads.  
424 Subsequent SPARSE analyses were performed on all the metagenomes in table 1 and  
425 additional metagenomes in electronic supplementary material, figure S7 as described in the  
426 SPARSE manual (<https://sparse.readthedocs.io/en/latest/>). The first step was 'SPARSE  
427 predict', which identifies ANI95% groups containing  $\geq 10$  specific reads. Subsequently,  
428 'SPARSE report --low 0.0001' was used to assign taxon designations to the ANI95% groups,  
429 and produce a table of all metagenome results (electronic supplementary material, table S3)  
430 which lists distinct taxa for each metagenome that accounted for  $\geq 0.0001\%$  of all its reads.  
431 Table S3 also includes the designations of oral complexes and other known pathogens  
432 according to a manually curated dictionary. Sequence reads were extracted from the  
433 metagenomes for assembling pseudo-MAGs with 'SPARSE extract'.

434 For electronic supplementary material, figures S5-S8, the taxonomic assignments were  
435 inversely weighted by genome size in order to render them comparable to DNA-DNA  
436 Checkerboard data and output from Metaphlan2, which calculate cell counts. To this end,  
437 the number of metagenomic reads assigned to each species within a metagenome was  
438 divided by the genome size of the SPARSE reference genome for that species. These data  
439 were then expressed as a proportion of the summed data for all microbial species within  
440 that metagenome.

### 441 (c) Metagenomes lacking reads from the oral microbiome.

442 We tested all metagenomes to identify any that might be grossly contaminated by collating  
443 the fifty most abundant microbial species over all metagenomes (electronic supplementary  
444 material, table S4A). The percentage of reads in these 50 taxa was summed for each  
445 metagenome, and expressed as a percentage of all microbial reads. Seven metagenomes  
446 (ancient dental calculus: 5; modern saliva: 2; electronic supplementary material, table S2)  
447 were excluded because the percentages of those top oral microbes constituted  $< 15\%$  of  
448 their total microbial reads.



449 (d) Dimension reduction of frequencies of reads.

450 Two forms of dimensional reduction of diversity were used to detect source-specific  
451 clustering within the SPARSE results. UMAP analysis was performed with its Python  
452 implementation [42], using the parameters `min_neighbors=5` and `min_dist=0.0`. PCA was  
453 performed using the `decomposition.PCA` module of the scikit-learn Python library [55].  
454 Optimal k-mean clusters of the first three components from the UMAP analysis were  
455 calculated with the `sklearn.cluster` module of the scikit-learn Python library.

456 (e) Ranking of microbial species by their associations with source.

457 Microbial species were ranked by their weighting according to a Support Vector Machine  
458 (SVM) classification [43]. A supervised SVM classification of samples was performed using  
459 the SVM module of the scikit-learn Python library on the raw SPARSE results (electronic  
460 supplementary material, table S3). The SVM classification was performed 300 times on a  
461 randomly chosen training set consisting of 60% of all samples with varying penalty hyper-  
462 parameter C, and scored using 5-fold cross-validation. The model was then tested with the  
463 optimal hyper-parameter from all runs on the remaining 40% of samples, and correctly  
464 inferred the oral source for >96% of the test samples. The optimal SVM coefficients for each  
465 individual species were estimated by training that model once again on all the oral samples.  
466 The order of the species in figure 2 consists of the SVM weights (squares of the coefficients;  
467 [56]) in descending order. The Python scripts described in sections d and e, as well as their  
468 outputs are freely accessible online as Dataset S3 in  
469 <https://github.com/zheminzhou/OralMicrobiome>.

470 (f) Genome reconstructions for *Streptococcus mutans* and *Streptococcus sobrinus*

471 SPARSE identified samples in which the metagenomic sequence reads covered at least 2MB  
472 of the reference genome for *S. mutans* (ANI95% cluster s5; 66 samples) or *S. sobrinus*  
473 (s3465; 28 samples) (figures 4B,D). The cleaned, species-specific reads generated from these  
474 samples as in Methods b were processed with the standalone version of EToKi as described  
475 in figure S6 of Zhou *et al.* 2020 [2] and in greater detail in the online manual  
476 (<https://github.com/zheminzhou/EToKi>). EToKi assemble was then used to identify genome-  
477 specific reads after specifying a reference genome, an in-group of related genomes, and a  
478 related but distinct out-group of other genomes. For *S. mutans* the reference genome was  
479 UA159 (accession code GCF\_000007465), the in-group was 194 other *S. mutans* genomes in  
480 RefSeq (electronic supplementary material, table S5) and the outgroup was 62 genomes  
481 from other species in the Mutans *Streptococcus* group according to Zhou and Achtman,  
482 2020 [44]. For *S. sobrinus* the reference genome was NCTC12279 (accession code  
483 GCF\_900475395), the ingroup was 45 other *S. sobrinus* genomes and the outgroup was 211  
484 genomes from other Mutans streptococci (electronic supplementary material, table S5). The  
485 assemble module replaces nucleotides in the reference genome by their calculated SNVs  
486 after checking that they are supported by at least 70% of at least 3 metagenomic reads, and  
487 that the supporting read frequencies are at least one-third of the average read depth. The  
488 resulting pseudo-MAGs are listed in electronic supplementary material, table S6 and are  
489 freely accessible online as Datasets S1 and S2 in  
490 <https://github.com/zheminzhou/OralMicrobiome>.

491 ‘EToKi align’ was used to create an alignment of non-repetitive SNPs from 31 *S. mutans*  
492 pseudo-MAGs plus all 195 *S. mutans* genomes plus the sole *S. troglodytae* genome in RefSeq  
493 (electronic supplementary material, table S5). The alignments spanned 1.73 MB that were  
494 shared by  $\geq 95\%$  of the genomes, and covered 181,321 core SNPs. Similarly, an alignment of  
495 15 *S. sobrinus* MAGs, 46 draft or complete *S. sobrinus* genomes plus 6 genomes of  
496 *Streptococcus downei* from RefSeq spanned 1.16 MB and contained 160,863 core SNPs.  
497 These alignments were subjected to Maximum Likelihood phylogeny reconstruction by  
498 EToKi phylo. Both ML trees were then visualised with GrapeTree [3].

#### 499 (g) DNA damage patterns for ancient *S. mutans* reads

500 SPARSE assigned low numbers of sequence reads to *S. mutans* in 10 metagenomes from  
501 ancient dental calculus (figure 6, electronic supplementary material, table S3). In order to  
502 assess their authenticity, these reads were assessed with MapDamage2 [49] for patterns of  
503 cytosine deamination that are characteristic of authentic ancient DNA. To this end, all *S.*  
504 *mutans*-specific reads were extracted with SPARSE. They were aligned to the *S. mutans*  
505 reference genome UA159 with Minimap2 [37], and reads which were  $\geq 95\%$  identical with  
506 the reference genome were used to create BAM alignments. SouthAfr2 contained 11  
507 specific reads according to SPARSE, but only eight survived this filtering step. SouthAfr2 was  
508 therefore excluded from further analyses because these were too few reads to provide  
509 reliable analyses. The BAM alignments from the remaining nine metagenomes consist of  
510 both fully aligned reads (46-72%) and others which were “soft-clipped”, i.e. terminal bases  
511 were not aligned to the reference genome. In order to ensure that these soft-clipped reads  
512 were also specific, we compared the alignment scores for all reads against UA159 with the  
513 alignments scores against the 62 outgroup genomes in Mutans Streptococci (electronic  
514 supplementary material, table S5), and found that the scores with UA159 were highest. We  
515 also tested the alignment scores against two other *S. mutans* genomes (SA38,  
516 [GCF\_000339615]; 4VF1 [GCF\_000339215]; electronic supplementary material, table S5),  
517 but neither yielded higher alignment scores than UA159. The outputs from MapDamage2  
518 show the soft-clipping ends by a yellow line (electronic supplementary material, figures S4A-  
519 D).

520



521 **Data availability**

522 The pseudo-MAGs reconstructed from metagenomes for *S. mutans* and *S. sobrinus* are  
523 freely accessible in tar.gz files containing [Datasets S1](#) and [Dataset S2](#) at  
524 <https://github.com/zheminzhou/OralMicrobiome>, respectively. Python scripts that were  
525 used to prepare data for figures 1-5 and S1-S3 are available as [Dataset S3](#) in the same  
526 repository. The taxonomic profiling by SPARSE of all 784 metagenomes is available in  
527 electronic supplementary material, table S3. Interactive versions of Figure 7 are available at  
528 <http://enterobase.warwick.ac.uk/a/42277> (figure 7A) and  
529 <http://enterobase.warwick.ac.uk/a/42279> (figure 7B)

530 **Authors' contributions.** Z.Z. analysed data and prepared the figures. M.A. and Z.Z.  
531 interpreted the results and wrote the manuscript.

532 **Competing interests.** We have no competing interests.

533 **Funding.** This project was supported by the Wellcome Trust (202792/Z/16/Z) and  
534 EnteroBase development was funded by the BBSRC (BB/L020319/1).

535 References

536

537 1. Zhou, Z., Luhmann, N., Alikhan, N.-F., Quince, C., and Achtman, M. 2018 Accurate  
538 reconstruction of microbial strains from metagenomic sequencing using  
539 representative reference genomes. In *RECOMB 2018*, pp. 225-240: Springer, Cham.

540 2. Zhou, Z., Alikhan, N.-F., Mohamed, K., Fan, Y., Agama Study Group, and Achtman, M. 2020 The  
541 Enterobase user's guide, with case studies on *Salmonella* transmissions, *Yersinia pestis*  
542 phylogeny, and *Escherichia* core genomic diversity. *Genome Res* **30**, 138-152.  
543 (doi:gr.251678.119 [pii];10.1101/gr.251678.119 [doi])

544 3. Zhou, Z., Alikhan, N.-F., Sergeant, M. J., Luhmann, N., Vaz, C., Francisco, A. P., Carrico, J. A., and  
545 Achtman, M. 2018 GrapeTree: Visualization of core genomic relationships among  
546 100,000 bacterial pathogens. *Genome Res* **28**, 1395-1404. (doi:DOI:  
547 10.1101/gr.232397.117)

548 4. Zhou, Z. *et al.*. 2018 Pan-genome analysis of ancient and modern *Salmonella enterica*  
549 demonstrates genomic stability of the invasive Para C Lineage for millennia. *Curr Biol*  
550 **28**, 2420-2428. (doi:<https://doi.org/10.1016/j.cub.2018.05.058>)

551 5. Socransky, S. S., Haffajee, A. D., Cugini, M. A., Smith, C., and Kent, R. L., Jr. 1998 Microbial  
552 complexes in subgingival plaque. *J Clin Periodontol* **25**, 134-144.

553 6. Bos, K. I. *et al.*. 2014 Pre-Columbian mycobacterial genomes reveal seals as a source of New  
554 World human tuberculosis. *Nature* **514**, 494-497. (doi:nature13591  
555 [pii];10.1038/nature13591 [doi])

- 556 7. Kay, G. L. *et al.*. 2015 Eighteenth-century genomes show that mixed infections were common  
557 at time of peak tuberculosis in Europe. *Nat Commun* **6**, 6717. (doi:ncomms7717  
558 [pii];10.1038/ncomms7717 [doi])
- 559 8. Schilling, A. K. *et al.*. 2019 British red squirrels remain the only known wild rodent host for  
560 leprosy bacilli. *Front Vet Sci* **6**, 8. (doi:10.3389/fvets.2019.00008 [doi])
- 561 9. Schuenemann, V. J. *et al.*. 2018 Ancient genomes reveal a high diversity of *Mycobacterium*  
562 *leprae* in medieval Europe. *PLoS Pathog* **14**, e1006997.  
563 (doi:10.1371/journal.ppat.1006997 [doi];PPATHOGENS-D-17-02430 [pii])
- 564 10. Bos, K. I. *et al.*. 2011 A draft genome of *Yersinia pestis* from victims of the Black Death. *Nature*  
565 **478**, 506-510.
- 566 11. Rasmussen, S. *et al.*. 2015 Early divergent strains of *Yersinia pestis* in Eurasia 5,000 years ago.  
567 *Cell* **163**, 571-582. (doi:S0092-8674(15)01322-7 [pii];10.1016/j.cell.2015.10.009 [doi])
- 568 12. Damgaard, P. B. *et al.*. 2018 137 ancient human genomes from across the Eurasian steppes.  
569 *Nature* **557**, 369-374. (doi:10.1038/s41586-018-0094-2 [doi];10.1038/s41586-018-  
570 0094-2 [pii])
- 571 13. Keller, M. *et al.*. 2019 Ancient *Yersinia pestis* genomes from across Western Europe reveal  
572 early diversification during the First Pandemic (541-750). *Proc Natl Acad Sci U S A* **116**,  
573 12363-12372. (doi:1820447116 [pii];10.1073/pnas.1820447116 [doi])

- 574 14. Spyrou, M. A. *et al.*. 2019 Phylogeography of the second plague pandemic revealed through  
575 analysis of historical *Yersinia pestis* genomes. *Nat Commun* **10**, 4470.  
576 (doi:10.1038/s41467-019-12154-0 [doi];10.1038/s41467-019-12154-0 [pii])
- 577 15. Vågene, Å. J. *et al.*. 2018 *Salmonella enterica* genomes from victims of a major sixteenth-  
578 century epidemic in Mexico. *Nature Ecology & Evolution* **2**, 520-528.
- 579 16. Key, F. M. *et al.*. 2020 Emergence of human-specific *Salmonella enterica* is linked to the  
580 Neolithization process. *Nature Ecology & Evolution* **4**, 324-333.  
581 (doi:<https://doi.org/10.1038/s41559-020-1106-9>)
- 582 17. Lacy, S. A. 2014 Oral health and its implications in late Pleistocene Western Eurasian humans.  
583 In (Anon.), pp. 1-239. St. Louis, MO, U.S.A.: Washington University.
- 584 18. Dewitte, S. N. and Bekvalac, J. 2010 Oral health and frailty in the medieval English cemetery of  
585 St Mary Graces. *Am J Phys Anthropol* **142**, 341-354. (doi:10.1002/ajpa.21228 [doi])
- 586 19. Carter, F. and Irish, J. D. 2019 A sub-continent of caries: Prevalence and severity in early  
587 holocene through recent Africans. In (Anon.), pp. 22-29.
- 588 20. Towle, I., Irish, J. D., De Groote, I., and Fernée, C. 2019 Dental caries in human evolution:  
589 frequency of carious lesions in South African fossil hominins. *BioRxiv*, 597385.
- 590 21. Adler, C. J. *et al.*. 2013 Sequencing ancient calcified dental plaque shows changes in oral  
591 microbiota with dietary shifts of the Neolithic and Industrial revolutions. *Nature*  
592 *Genet.*

- 593 22. Warinner, C. *et al.*. 2014 Pathogens and host immunity in the ancient human oral cavity.  
594 *Nature Genet* **46**, 336-344. (doi:ng.2906 [pii];10.1038/ng.2906 [doi])
- 595 23. Warinner, C., Speller, C., and Collins, M. J. 2015 A new era in palaeomicrobiology: prospects  
596 for ancient dental calculus as a long-term record of the human oral microbiome. *Philos*  
597 *Trans R Soc Lond B Biol Sci* **370**, 20130376. (doi:rspb.2013.0376  
598 [pii];10.1098/rspb.2013.0376 [doi])
- 599 24. Velsko, I. M. *et al.*. 2019 Microbial differences between dental plaque and historic dental  
600 calculus are related to oral biofilm maturation stage. *Microbiome* **7**, 102.  
601 (doi:10.1186/s40168-019-0717-3 [doi];10.1186/s40168-019-0717-3 [pii])
- 602 25. Coll, F., McNerney, R., Guerra-Assuncao, J. A., Glynn, J. R., Perdigao, J., Viveiros, M., Portugal,  
603 I., Pain, A., Martin, N., and Clark, T. G. 2014 A robust SNP barcode for typing  
604 *Mycobacterium tuberculosis* complex strains. *Nat Commun* **5**, 4812. (doi:ncomms5812  
605 [pii];10.1038/ncomms5812 [doi])
- 606 26. Achtman, M. 2016 How old are bacterial pathogens? *Proc Biol Sci* **283**, 1836.
- 607 27. Alikhan, N.-F., Zhou, Z., Sergeant, M. J., and Achtman, M. 2018 A genomic overview of the  
608 population structure of *Salmonella*. *PLoS Genet* **14**, e1007261.  
609 (doi:10.1371/journal.pgen.1007261 [doi];PGENETICS-D-18-00122 [pii])
- 610 28. Socransky, S. S. and Haffajee, A. D. 2005 Periodontal microbial ecology. *Periodontol 2000* **38**,  
611 135-187. (doi:PRD107 [pii];10.1111/j.1600-0757.2005.00107.x [doi])

- 612 29. Pasolli, E. *et al.*. 2019 Extensive unexplored human microbiome diversity revealed by over  
613 150,000 genomes from metagenomes spanning age, geography, and lifestyle. *Cell* **176**,  
614 649-662. (doi:S0092-8674(19)30001-7 [pii];10.1016/j.cell.2019.01.001 [doi])
- 615 30. Nayfach, S., Shi, Z. J., Seshadri, R., Pollard, K. S., and Kyrpides, N. C. 2019 New insights from  
616 uncultivated genomes of the global human gut microbiome. *Nature* **568**, 505-510.  
617 (doi:10.1038/s41586-019-1058-x [doi];10.1038/s41586-019-1058-x [pii])
- 618 31. Velsko, I. M., Frantz, L. A. F., Herbig, A., Larson, G., and Warinner, C. 2018 Selection of  
619 appropriate metagenome taxonomic classifiers for ancient microbiome research.  
620 *mSystems* **3**. (doi:10.1128/mSystems.00080-18 [doi];mSystems00080-18 [pii])
- 621 32. McIntyre, A. B. R. *et al.*. 2017 Comprehensive benchmarking and ensemble approaches for  
622 metagenomic classifiers. *Genome Biol* **18**, 182. (doi:10.1186/s13059-017-1299-7  
623 [doi];10.1186/s13059-017-1299-7 [pii])
- 624 33. Sczyrba, A. *et al.*. 2017 Critical assessment of metagenome interpretation - a benchmark of  
625 computational metagenomics software. *BioRxiv*. (doi:10.1101/099127)
- 626 34. Cribdon, B., Ware, R., Smith, O., Gaffney, V., and Allaby, R. G. 2020 PIA: More accurate  
627 taxonomic assignment of metagenomic data demonstrated on sedaDNA from the  
628 North Sea. In (Anon.), p. 84.
- 629 35. Konstantinidis, K. T. and Tiedje, J. M. 2005 Genomic insights that advance the species  
630 definition for prokaryotes. *Proc Natl Acad Sci USA* **102**, 2567-2572.

- 631 36. Jain, C., Rodriguez, R., Phillippy, A. M., Konstantinidis, K. T., and Aluru, S. 2018 High throughput  
632 ANI analysis of 90K prokaryotic genomes reveals clear species boundaries. *Nat*  
633 *Commun* **9**, 5114. (doi:10.1038/s41467-018-07641-9 [doi];10.1038/s41467-018-07641-  
634 9 [pii])
- 635 37. Li, H. 2018 Minimap2: pairwise alignment for nucleotide sequences. *Bioinformatics* **34**, 3094-  
636 3100. (doi:4994778 [pii];10.1093/bioinformatics/bty191 [doi])
- 637 38. Stamatakis, A. 2014 RAxML version 8: a tool for phylogenetic analysis and post-analysis of  
638 large phylogenies. *Bioinformatics* **30**, 1312-1313. (doi:btu033  
639 [pii];10.1093/bioinformatics/btu033 [doi])
- 640 39. Abranches, J., Zeng, L., Kajfasz, J. K., Palmer, S. R., Chakraborty, B., Wen, Z. T., Richards, V. P.,  
641 Brady, L. J., and Lemos, J. A. 2018 Biology of oral streptococci. *Microbiol Spectr* **6**.  
642 (doi:10.1128/microbiolspec.GPP3-0042-2018 [doi])
- 643 40. Johansson, I., Witkowska, E., Kaveh, B., Lif, H. P., and Tanner, A. C. 2016 The microbiome in  
644 populations with a low and high prevalence of caries. *J Dent Res* **95**, 80-86.  
645 (doi:0022034515609554 [pii];10.1177/0022034515609554 [doi])
- 646 41. Oda, Y., Hayashi, F., and Okada, M. 2015 Longitudinal study of dental caries incidence  
647 associated with *Streptococcus mutans* and *Streptococcus sobrinus* in patients with  
648 intellectual disabilities. *BMC Oral Health* **15**, 102. (doi:10.1186/s12903-015-0087-6  
649 [doi];10.1186/s12903-015-0087-6 [pii])



- 650 42. Becht, E., McInnes, L., Healy, J., Dutertre, C. A., Kwok, I. W. H., Ng, L. G., Ginhoux, F., and  
651 Newell, E. W. 2019 Dimensionality reduction for visualizing single-cell data using  
652 UMAP. *Nat Biotechnol* **37**, 38-44. (doi:nbt.4314 [pii];10.1038/nbt.4314 [doi])
- 653 43. Platt, J. C. 2019 Probabilistic outputs for Support Vector Machines and comparisons to  
654 regularized likelihood methods. *Advances in Large Margin Classifiers*.
- 655 44. Zhou, Z. and Achtman, M. 2020 Accurate reconstruction of bacterial pan- and core- genomes  
656 with PEPPA. *BioRxiv*, 01.03.894154. (doi:doi.org/10.1101/2020.01.03.894154)
- 657 45. Simón-Soro, A. and Mira, A. 2015 Solving the etiology of dental caries. *Trends Microbiol* **23**, 76-  
658 82. (doi:S0966-842X(14)00225-X [pii];10.1016/j.tim.2014.10.010 [doi])
- 659 46. Richards, V. P., Alvarez, A. J., Luce, A. R., Bedenbaugh, M., Mitchell, M. L., Burne, R. A., and  
660 Nascimento, M. M. 2017 Microbiomes of site-specific dental plaques from children  
661 with different caries status. *Infect Immun* **85**. (doi:IAI.00106-17  
662 [pii];10.1128/IAI.00106-17 [doi])
- 663 47. Bowen, W. H., Burne, R. A., Wu, H., and Koo, H. 2018 Oral biofilms: Pathogens, matrix, and  
664 polymicrobial interactions in microenvironments. *Trends Microbiol* **26**, 229-242.  
665 (doi:S0966-842X(17)30213-5 [pii];10.1016/j.tim.2017.09.008 [doi])
- 666 48. Banas, J. A. and Drake, D. R. 2018 Are the mutans streptococci still considered relevant to  
667 understanding the microbial etiology of dental caries? *BMC Oral Health* **18**, 129.  
668 (doi:10.1186/s12903-018-0595-2 [doi];10.1186/s12903-018-0595-2 [pii])

- 669 49. Jonsson, H., Ginolhac, A., Schubert, M., Johnson, P. L., and Orlando, L. 2013 mapDamage2.0:  
670 fast approximate Bayesian estimates of ancient DNA damage parameters.  
671 *Bioinformatics* **29**, 1682-1684. (doi:btt193 [pii];10.1093/bioinformatics/btt193 [doi])
- 672 50. Zhang, X. *et al.*. 2015 The oral and gut microbiomes are perturbed in rheumatoid arthritis and  
673 partly normalized after treatment. *Nat Med* **21**, 895-905. (doi:nm.3914  
674 [pii];10.1038/nm.3914 [doi])
- 675 51. Cornejo, O. E. *et al.*. 2013 Evolutionary and population genomics of the cavity causing bacteria  
676 *Streptococcus mutans*. *Mol Biol Evol* **30**, 881-893.
- 677 52. Fonkou, M. D. M., Dufour, J.-C., Dubourg, G., and Raoult, D. 2018 Repertoire of bacterial  
678 species cultured from the human oral cavity and respiratory tract. In (Anon.), p. 0181.
- 679 53. Rylev, M. and Kilian, M. 2008 Prevalence and distribution of principal periodontal pathogens  
680 worldwide. *J Clin Periodontol* **35**, 346-361. (doi:CPE1280 [pii];10.1111/j.1600-  
681 051X.2008.01280.x [doi])
- 682 54. Ondov, B. D., Treangen, T. J., Melsted, P., Mallonee, A. B., Bergman, N. H., Koren, S., and  
683 Phillippy, A. M. 2016 Mash: fast genome and metagenome distance estimation using  
684 MinHash. *Genome Biol* **17**, 132. (doi:10.1186/s13059-016-0997-x  
685 [doi];10.1186/s13059-016-0997-x [pii])
- 686 55. Pedregosa, F. *et al.*. 2011 Scikit-learn: Machine Learning in Python. *Journal of Machine*  
687 *Learning Research* **12**, 2825-2830.

- 688 56. Guyon, I., Weston, J., Barnhill, S., and Vapnik, V. 2002 Gene selection for cancer classification  
689 using Support Vector Machines. *Machine Learning* **46**, 389-422.  
690 (doi:10.1023/A:1012487302797)
- 691 57. Mann, A. E. *et al.*. 2018 Differential preservation of endogenous human and microbial DNA in  
692 dental calculus and dentin. *Sci Rep* **8**, 9822. (doi:10.1038/s41598-018-28091-9  
693 [doi];10.1038/s41598-018-28091-9 [pii])
- 694 58. Espinoza, J. L. *et al.*. 2018 Supragingival plaque microbiome ecology and functional potential in  
695 the context of health and disease. *MBio* **9**. (doi:mBio.01631-18  
696 [pii];10.1128/mBio.01631-18 [doi])
- 697 59. Shi, B., Chang, M., Martin, J., Mitreva, M., Lux, R., Klokkevold, P., Sodergren, E., Weinstock, G.  
698 M., Haake, S. K., and Li, H. 2015 Dynamic changes in the subgingival microbiome and  
699 their potential for diagnosis and prognosis of periodontitis. *MBio* **6**, e01926-14.  
700 (doi:mBio.01926-14 [pii];10.1128/mBio.01926-14 [doi])
- 701 60. Liu, B. *et al.*. 2012 Deep sequencing of the oral microbiome reveals signatures of periodontal  
702 disease. *PLoS ONE* **7**, e37919. (doi:10.1371/journal.pone.0037919 [doi];PONE-D-11-  
703 24763 [pii])
- 704 61. McLean, J. S., Liu, Q., Thompson, J., Edlund, A., and Kelley, S. 2015 Draft genome sequence of  
705 "Candidatus *Bacteroides periocalifornicus*," a new member of the *Bacteroidetes*  
706 phylum found within the oral microbiome of periodontitis patients. *Genome Announc*  
707 **3**. (doi:3/6/e01485-15 [pii];10.1128/genomeA.01485-15 [doi])

- 708 62. Wang, J., Jia, Z., Zhang, B., Peng, L., and Zhao, F. 2019 Tracing the accumulation of in vivo  
709 human oral microbiota elucidates microbial community dynamics at the gateway to  
710 the GI tract. *Gut*. (doi:gutjnl-2019-318977 [pii];10.1136/gutjnl-2019-318977 [doi])
- 711 63. Marotz, C. A., Sanders, J. G., Zuniga, C., Zaramela, L. S., Knight, R., and Zengler, K. 2018  
712 Improving saliva shotgun metagenomics by chemical host DNA depletion. *Microbiome*  
713 **6**, 42. (doi:10.1186/s40168-018-0426-3 [doi];10.1186/s40168-018-0426-3 [pii])
- 714 64. Belstrom, D., Constancias, F., Liu, Y., Yang, L., Drautz-Moses, D. I., Schuster, S. C., Kohli, G. S.,  
715 Jakobsen, T. H., Holmstrup, P., and Givskov, M. 2017 Metagenomic and  
716 metatranscriptomic analysis of saliva reveals disease-associated microbiota in patients  
717 with periodontitis and dental caries. *NPJ Biofilms Microbiomes* **3**, 23.  
718 (doi:10.1038/s41522-017-0031-4 [doi];31 [pii])
- 719 65. Lassalle, F., Spagnoletti, M., Fumagalli, M., Shaw, L., Dyble, M., Walker, C., Thomas, M. G.,  
720 Bamberg, M. A., and Balloux, F. 2018 Oral microbiomes from hunter-gatherers and  
721 traditional farmers reveal shifts in commensal balance and pathogen load linked to  
722 diet. *Mol Ecol* **27**, 182-195. (doi:10.1111/mec.14435 [doi])
- 723 66. Takayasu, L. *et al.*. 2017 Circadian oscillations of microbial and functional composition in the  
724 human salivary microbiome. *DNA Res* **24**, 261-270. (doi:3052236  
725 [pii];10.1093/dnares/dsx001 [doi])
- 726 67. Brito, I. L. *et al.*. 2019 Transmission of human-associated microbiota along family and social  
727 networks. *Nat Microbiol* **4**, 964-971. (doi:10.1038/s41564-019-0409-6  
728 [doi];10.1038/s41564-019-0409-6 [pii])

- 729 68. Franzosa, E. A. *et al.*. 2014 Relating the metatranscriptome and metagenome of the human  
730 gut. *Proc Natl Acad Sci U S A* **111**, E2329-E2338. (doi:1319284111  
731 [pii];10.1073/pnas.1319284111 [doi])
- 732 69. Weyrich, L. S. *et al.*. 2017 Neanderthal behaviour, diet, and disease inferred from ancient DNA  
733 in dental calculus. *Nature* **544**, 357-361. (doi:nature21674 [pii];10.1038/nature21674  
734 [doi])
- 735 70. Lefort, V., Desper, R., and Gascuel, O. 2015 FastME 2.0: A Comprehensive, Accurate, and Fast  
736 Distance-Based Phylogeny Inference Program. *Mol Biol Evol* **32**, 2798-2800.  
737 (doi:msv150 [pii];10.1093/molbev/msv150 [doi])  
738  
739

| Archive | Accession                                                                                           | Sets of short reads | Number of samples | Source           | Institute                                             | Citation |
|---------|-----------------------------------------------------------------------------------------------------|---------------------|-------------------|------------------|-------------------------------------------------------|----------|
| 1       | PRJNA445215                                                                                         | 62                  | 48                | ancient calculus | Max Planck Institute for the Science of Human History | [57]     |
| 2       | PRJEB30331, PRJNA454196                                                                             | 45                  | 44                | ancient calculus | University of Oxford                                  | [24]     |
| 3       | PRJNA216965                                                                                         | 9                   | 2                 | ancient calculus | University of Oklahoma                                | [22]     |
| 4       | PRJNA383868                                                                                         | 87                  | 87                | plaque           | J. Craig Venter Institute                             | [58]     |
| 5       | PRJNA255922                                                                                         | 48                  | 48                | plaque           | University of California, Los Angeles                 | [59]     |
| 6       | PRJNA78025                                                                                          | 7                   | 4                 | plaque           | University of Maryland                                | [60]     |
| 7       | PRJNA289925                                                                                         | 1                   | 1                 | plaque           | University of Washington                              | [61]     |
| 8       | PRJEB6997                                                                                           | 298                 | 298               | plaque & saliva  | BGI                                                   | [50]     |
| 9       | PRJNA230363                                                                                         | 12                  | 12                | plaque & saliva  | Chinese Academy of Sciences                           | [62]     |
| 10      | PRJEB24090                                                                                          | 61                  | 61                | saliva           | University of California San Diego                    | [63]     |
| 11      | PRJNA380727                                                                                         | 56                  | 55                | saliva           | Peking University School of Stomatology               |          |
| 12      | PRJNA396840                                                                                         | 30                  | 30                | saliva           | University of Copenhagen                              | [64]     |
| 13      | PRJEB14383                                                                                          | 28                  | 28                | saliva           | University College London                             | [65]     |
| 14      | PRJDB4115                                                                                           | 26                  | 26                | saliva           | University of Tokyo                                   | [66]     |
| 15      | PRJNA217052                                                                                         | 217                 | 18                | saliva           | Broad Institute                                       | [67]     |
| 16      | PRJNA188481                                                                                         | 8                   | 8                 | saliva           | Broad Institute                                       | [68]     |
| 17      | <a href="http://dx.doi.org/10.4225/55/584775546a409">http://dx.doi.org/10.4225/55/584775546a409</a> | 21                  | 21                | ancient calculus | OAGR, University of Adelaide                          | [69]     |

Table 1. Sources of metagenomic reads.

Note: Ancient calculus refers to ancient dental calculus from historical samples. Plaque and saliva refer to modern dental plaque and saliva.

Sets of short reads were downloaded from GenBank except for Archive 17, which was downloaded from the Online Ancient Genome Repository.

Seven metagenomes (electronic supplementary material, table S2), (Archive 11:2; Archive 17: 5) were excluded from further analyses because they contained too few reads from common microbial taxa in the oral microbiome.

Table 2. Sources of genomes from cultivated bacteria and metagenomic samples.

| Category          | Sub-category            | Number |
|-------------------|-------------------------|--------|
| Bacterial genomes |                         | 262    |
|                   | <i>S. mutans</i>        | 195    |
|                   | <i>S. sobrinus</i>      | 50     |
|                   | others                  | 17     |
| Metagenome source |                         | 784    |
|                   | Ancient dental calculus | 110    |
|                   | Modern plaque           | 287    |
|                   | Modern saliva           | 387    |
| Metagenome size   | (nucleotides)           |        |
|                   | 0-2GB                   | 343    |
|                   | 2-4GB                   | 129    |
|                   | 4-6GB                   | 162    |
|                   | 6-8GB                   | 93     |
|                   | 8-10GB                  | 45     |
|                   | >10GB                   | 12     |
| Country           |                         |        |
|                   | <b>Asia</b>             | 442    |
|                   | China                   | 375    |
|                   | Japan                   | 32     |
|                   | Philippines             | 28     |
|                   | Others                  | 7      |
|                   |                         |        |
|                   | <b>North America</b>    | 159    |
|                   | U.S.A.                  | 157    |
|                   | Guadeloupe              | 2      |
|                   |                         |        |
|                   | <b>Europe</b>           | 166    |
|                   | U.K.                    | 75     |
|                   | Ireland                 | 36     |
|                   | Denmark                 | 31     |
|                   | Others                  | 24     |
|                   |                         |        |
|                   | <b>Oceania</b>          | 111    |
|                   | Australia               | 92     |
|                   | Fiji                    | 18     |
|                   | Papua New Guinea        | 1      |
|                   |                         |        |
|                   | <b>Africa</b>           | 9      |
|                   | South Africa            | 6      |
|                   | Sudan                   | 2      |
|                   | Sierra Leone            | 1      |

Additional details can be found in electronic supplementary material, table S1.



Table 3. Detailed summary of Archaea and Viruses in all 786 samples.

| Taxonomy                                    | No. ancient samples (110) | Percent of reads | No. plaque (287) | Percent of reads | No. saliva (387) | Percent of reads |
|---------------------------------------------|---------------------------|------------------|------------------|------------------|------------------|------------------|
| <b>Host (Human)</b>                         | <b>110</b>                | <b>0.32</b>      | <b>243</b>       | <b>9.12</b>      | <b>335</b>       | <b>7.05</b>      |
| <b>Archaea (4)</b>                          | <b>81</b>                 | <b>1.78</b>      | <b>26</b>        | <b>2E-4</b>      | <b>45</b>        | <b>1E-4</b>      |
| <i>Methanobrevibacter oralis</i>            | 79                        | 1.76             | 26               | 2E-4             | 43               | 1E-4             |
| <i>Methanobrevibacter smithii</i>           | 1                         | 3E-5             |                  |                  | 2                | 2E-6             |
| <i>Candidatus Nitrosoarchaeum koreensis</i> | 1                         | 1E-5             |                  |                  | 0                |                  |
| <i>Thermoplasmatales archaeon BRNA1</i>     | 1                         | 7E-6             |                  |                  | 0                |                  |
| <b>Human viruses (4)</b>                    | <b>0</b>                  |                  | <b>25</b>        | <b>3E-4</b>      | <b>189</b>       | <b>4E-3</b>      |
| <i>Human betaherpesvirus 7</i>              | 0                         |                  | 8                | 9E-6             | 150              | 6E-4             |
| <i>Human gammaherpesvirus 4</i>             | 0                         |                  | 16               | 3E-4             | 86               | 3E-3             |
| <i>Human alphaherpesvirus 1</i>             | 0                         |                  | 1                | 5E-6             | 9                | 8E-5             |
| <i>Human betaherpesvirus 6B</i>             | 0                         |                  | 0                |                  | 7                | 2E-5             |
| <b>Bacteriophages (12)</b>                  | <b>3</b>                  | <b>1E-5</b>      | <b>26</b>        | <b>3E-5</b>      | <b>117</b>       | <b>2E-4</b>      |
| <i>Streptococcus EJ-1</i>                   | 0                         |                  | 14               | 1E-5             | 56               | 8E-5             |
| <i>Streptococcus SM1</i>                    | 2                         | 5E-6             | 11               | 1E-5             | 41               | 3E-5             |
| <i>Streptococcus SpSL1</i>                  | 0                         |                  | 0                |                  | 9                | 2E-5             |
| <i>Streptococcus Dp-1</i>                   | 0                         |                  | 0                |                  | 7                | 2E-5             |
| <i>Streptococcus DT1</i>                    | 0                         |                  | 0                |                  | 7                | 2E-5             |
| <i>Streptococcus PH10</i>                   | 1                         | 6E-6             | 2                | 3E-6             | 7                | 6E-6             |
| <i>Klebsiella KP15</i>                      | 0                         |                  | 0                |                  | 6                | 6E-6             |
| <i>Lactococcus r1t</i>                      | 0                         |                  | 0                |                  | 6                | 4E-6             |
| <i>Streptococcus YMC-2011</i>               | 0                         |                  | 0                |                  | 4                | 1E-5             |
| <i>Propionibacterium PHL060L00</i>          | 0                         |                  | 0                |                  | 2                | 2E-6             |
| <i>Propionibacterium PHL179</i>             | 0                         |                  | 0                |                  | 1                | 2E-6             |
| <i>Propionibacterium PAD20</i>              | 0                         |                  | 0                |                  | 1                | 2E-6             |

No. refers to the numbers of samples after combining metagenomes from a common sample.

Percentage of reads refers to the percentage of all reads attributed to a taxon in all the metagenomes from that sample.

**Figure 1.** Source specificity of the percentage of species composition in 784 oral metagenomes according to SPARSE. (A) X-Y plot of the first three components from a UMAP (Uniform Manifold Approximation and Projection) [42] dimensional reduction of taxon abundances. (B) Neighbour-joining (FastMe2; [70]) hierarchical clustering based on the Euclidean distances between pairs of metagenomes. Euclidean p-distances were calculated between each pair as the square root of the sum of the squared pairwise differences in the percentage of reads assigned by SPARSE to each microbial taxon. Nodes whose cluster location was inconsistent with the UMAP clustering in part A are highlighted with black perimeters. Tree visualization: GrapeTree [3].

**Figure 2.** Average percentage abundance (left axis) of bacterial species by source for the 40 most discriminating species according to Support Vector Machine analysis. The relative abundances for each of the three sources are indicated by mini-histograms for each species; error bars indicate standard deviations. Species are sorted in descending order by predominant source and then by SVM weight (squared coefficient) in the optimal model. Species belonging to oral complexes are indicated by oral-complex-specific shapes and colours. Key legend: Source colours used in the mini-histograms and symbol for SVM weight. \*species designations assigned by RefSeq to single genomes which have not (yet) been confirmed by taxonomists. *S. mitis* is separated into multiple ANI95% clusters, two of which (s8897; s126097 [electronic supplementary material, table S3]) are among the predominant taxa associated with saliva.

**Figure 3.** Average percentage abundances in 784 metagenomes by oral source (key legend) of 28 species from six oral complexes described by Socransky *et al.* [5]. The oral sources are indicated by three mini-histogram bars for each species. Species are ordered from left to right by oral complex, whose colours designation is indicated at the top. Within each oral complex, the species order is by decreasing total abundance.

Figure 4. Neighbour-joining (FastMe2; [70]) hierarchical clustering based on the Euclidean distances between pairs of 245 microbial species whose percentage abundance was >2% in at least one metagenome. Members of the six oral complexes [5] are highlighted by coloured species names, whose colours indicate their oral complex membership. These species do not cluster by oral complex, but by other unnamed groupings, four of which are highlighted in gray. An expanded version of the same tree including all species labels is available in electronic supplementary material, figure S2. Branch length distance scale bar is next to the distance of 0.1.

**Figure 5.** Numbers of microbial taxa by source. A). Rarefaction curves of numbers of species by source, with 95% confidence estimates (shadow). Inset data indicates median numbers of species per sample by source, as well as the total numbers for all sources. Rarefactions were performed with the program script called SPARSE\_curve.py, using 1000 randomized permutations of the order of samples. B). Binned histograms of number of species by percentage of samples. The data for this plot was also calculated with SPARSE\_curve.py. C) Venn diagram of overlapping presence of taxa ( $\geq 0.0001\%$  abundance) for the three oral sources.

**Figure 6.** Reconstruction of pseudo-MAGs (metagenomic assembled genomes) of *S. mutans* and *S. sobrinus* from oral metagenomes. (A, C) Numbers of oral samples by source binned by the percentage of reads specific to *S. mutans* (A) and *S. sobrinus* (C). (B, D) Numbers of oral samples by source with an average coverage of at least 1x. The data are binned by the predicted read coverage against a reference genome of *S. mutans* (UA159) (B) and *S. sobrinus* (NCTC12279) (D). (E, F) Read coverage (Dots; left) and percentage of the reference genome that was unmasked ( $\geq 3$  reads;  $\geq 70\%$  consistency) (Histogram; right) in *S. mutans* (E) and *S. sobrinus* (F). Ordered by decreasing coverage.



**Figure 7.** Maximum Likelihood phylogenies of *S. mutans* and *S. sobrinus* genomes. (A) A RaxML [38] tree of 226 genomes of *S. mutans* (RefSeq: 195; pseudo-MAGs: 31) plus one genome of *S. troglodytae* as an outgroup. The tree was based on 181,321 non-repetitive SNPs in 1.73 Mb. (B) A RaxML tree of 61 genomes of *S. sobrinus* (RefSeq: 46; pseudo-MAGs: 15) plus six *S. downei* genomes as an outgroup. The tree was based on 160,863 non-repetitive SNPs in 1.13 Mb. Pseudo-MAGs are highlighted by thick black perimeters. Visualisation with GrapeTree [3]. Branches with a genetic distance of >0.1 were shortened for clarity, and are shown as dashed lines. Legend: Numbers of strains by country of origin for both trees.



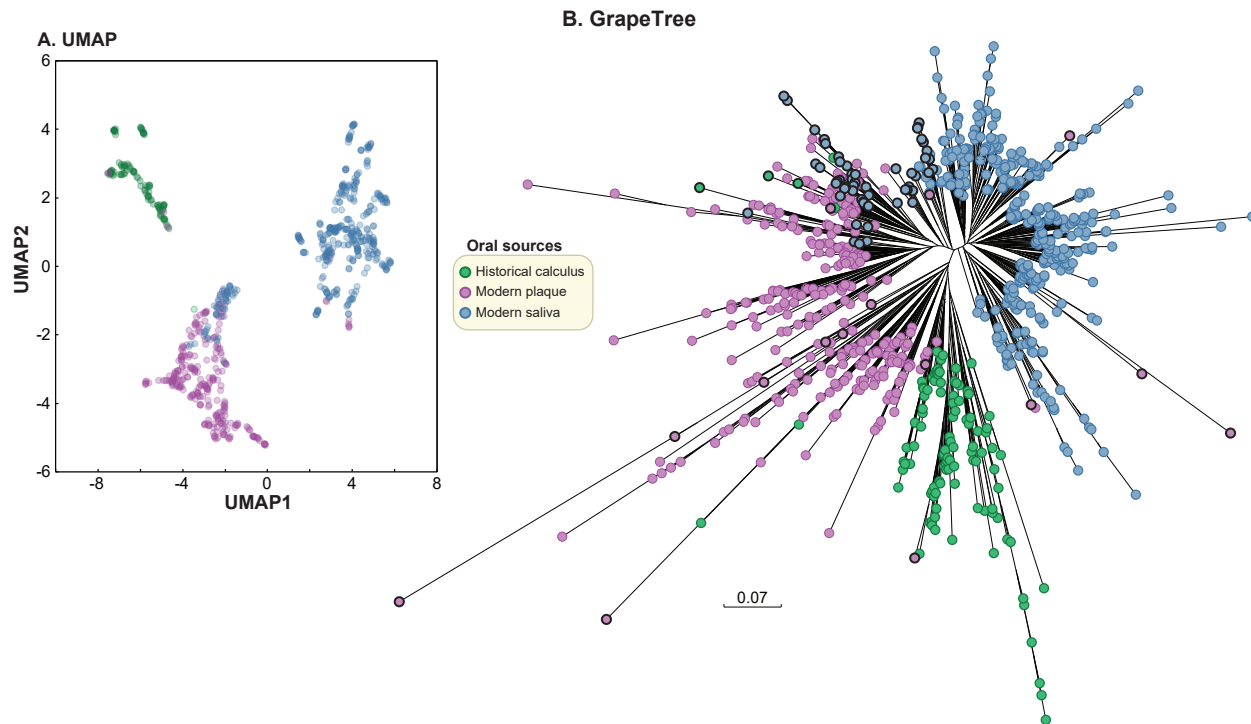

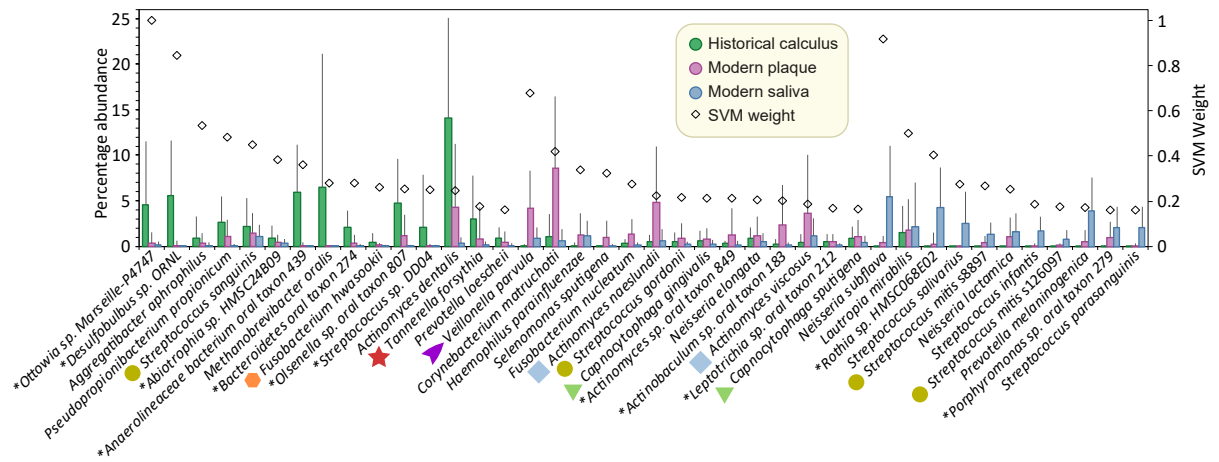

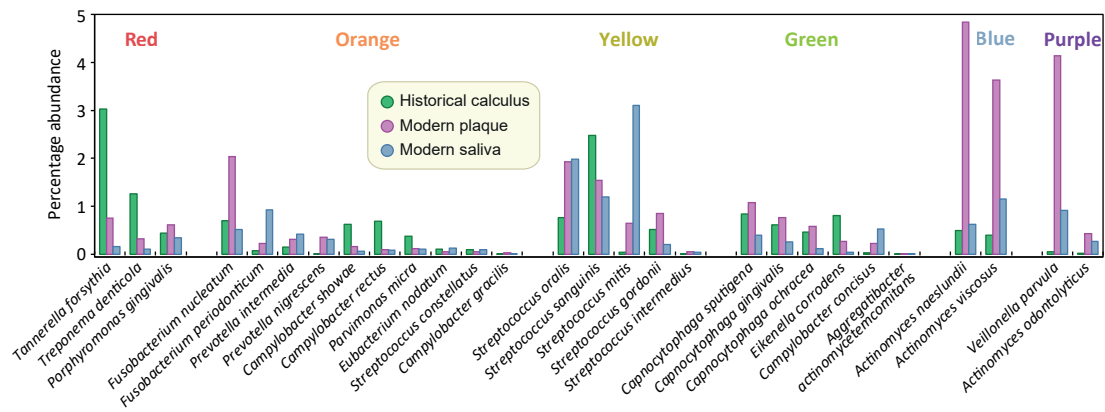

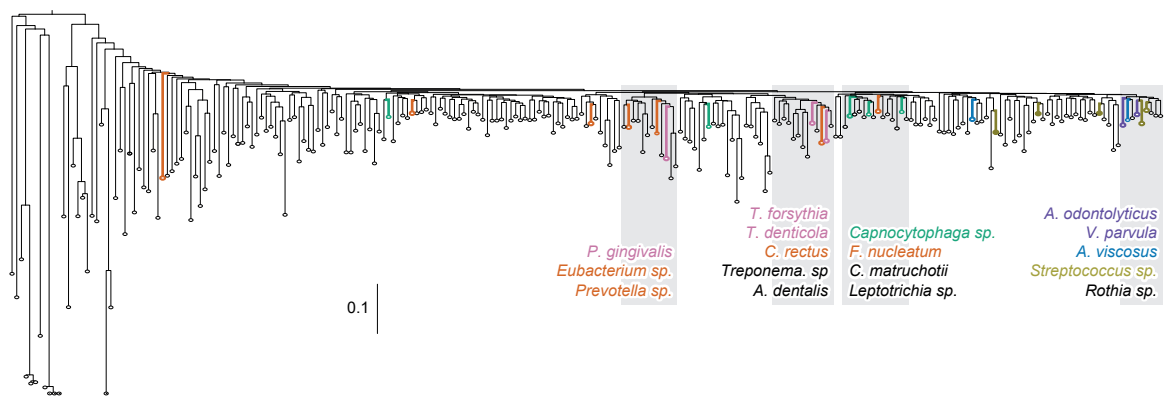

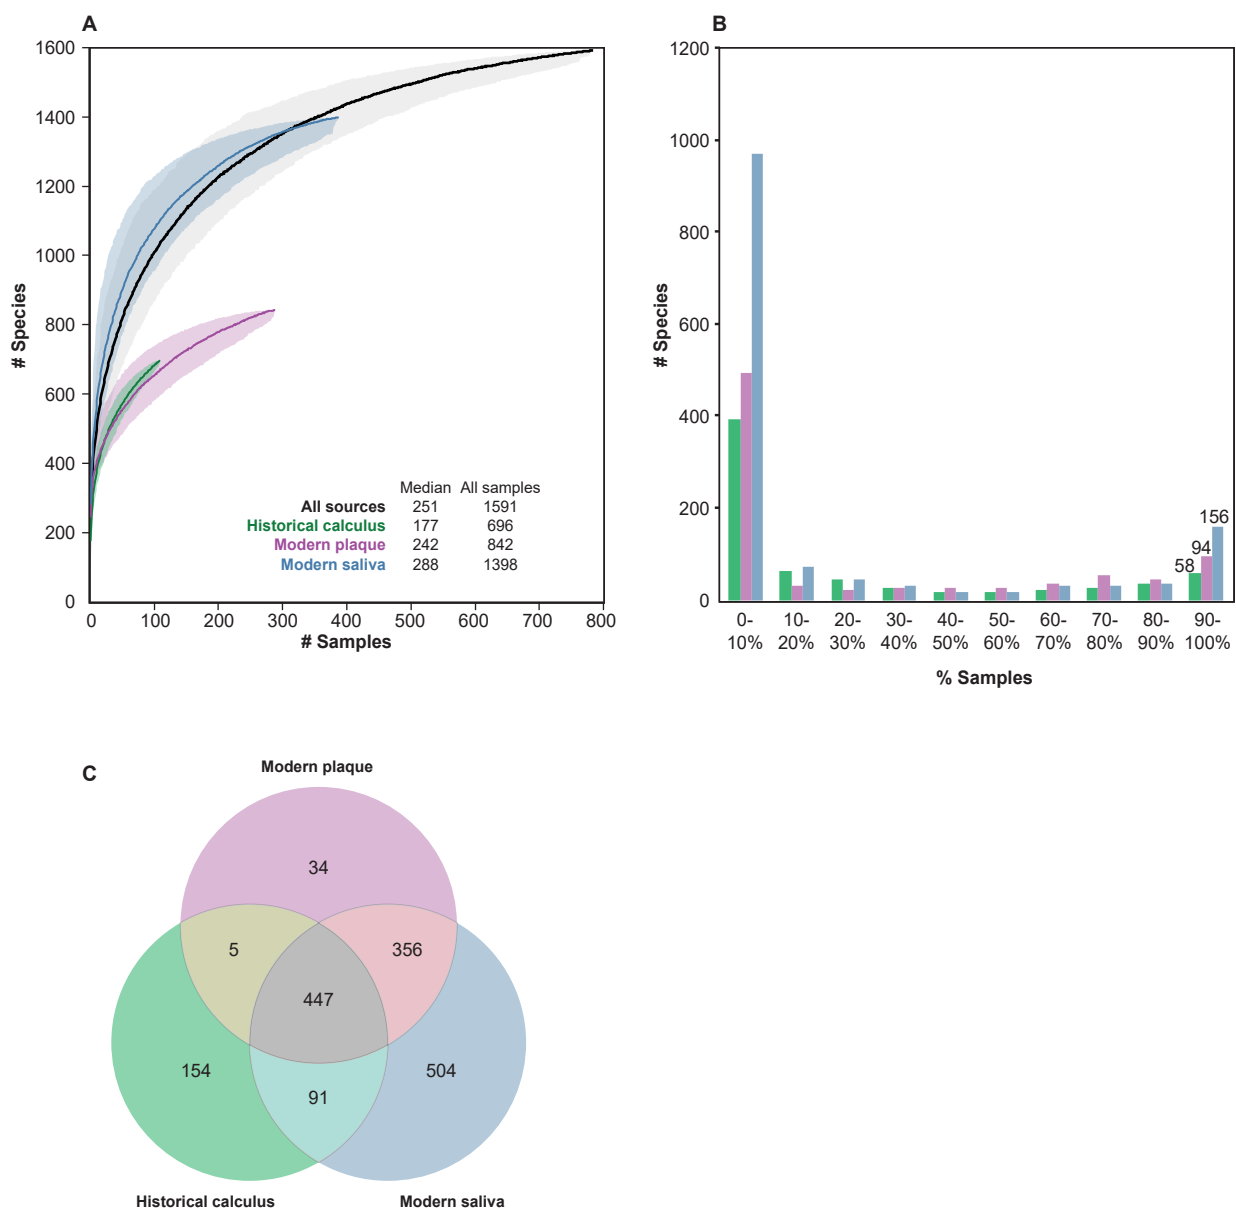

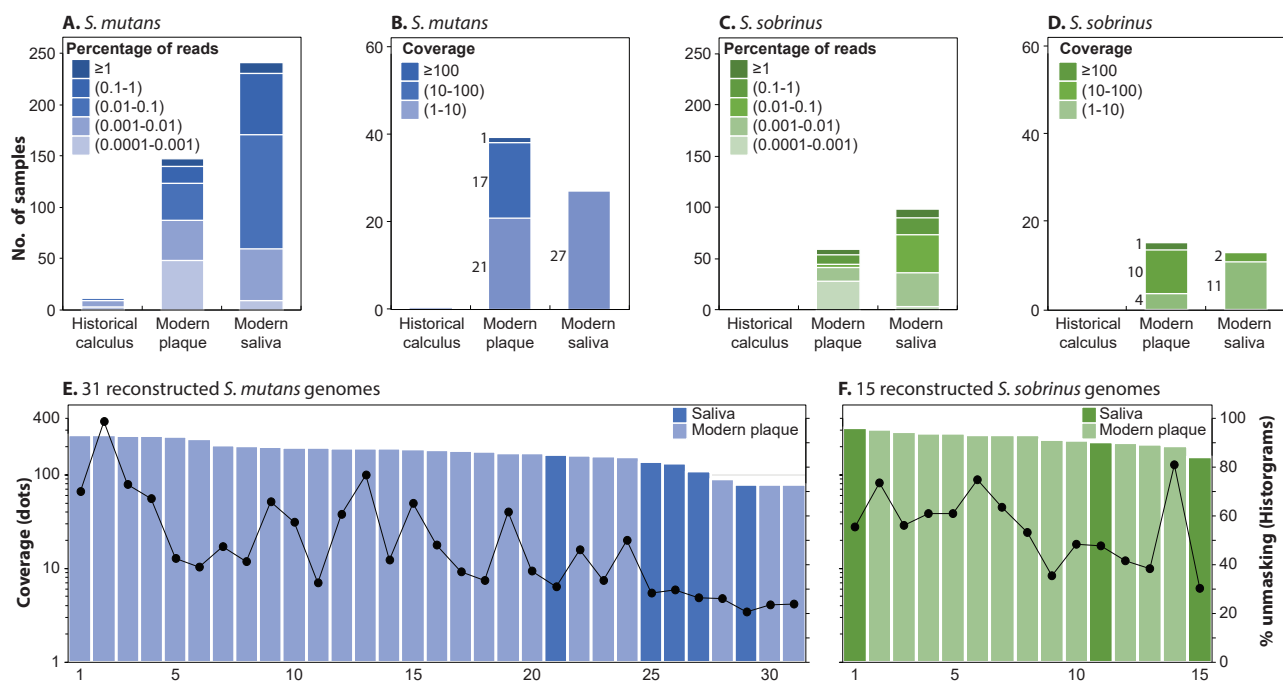



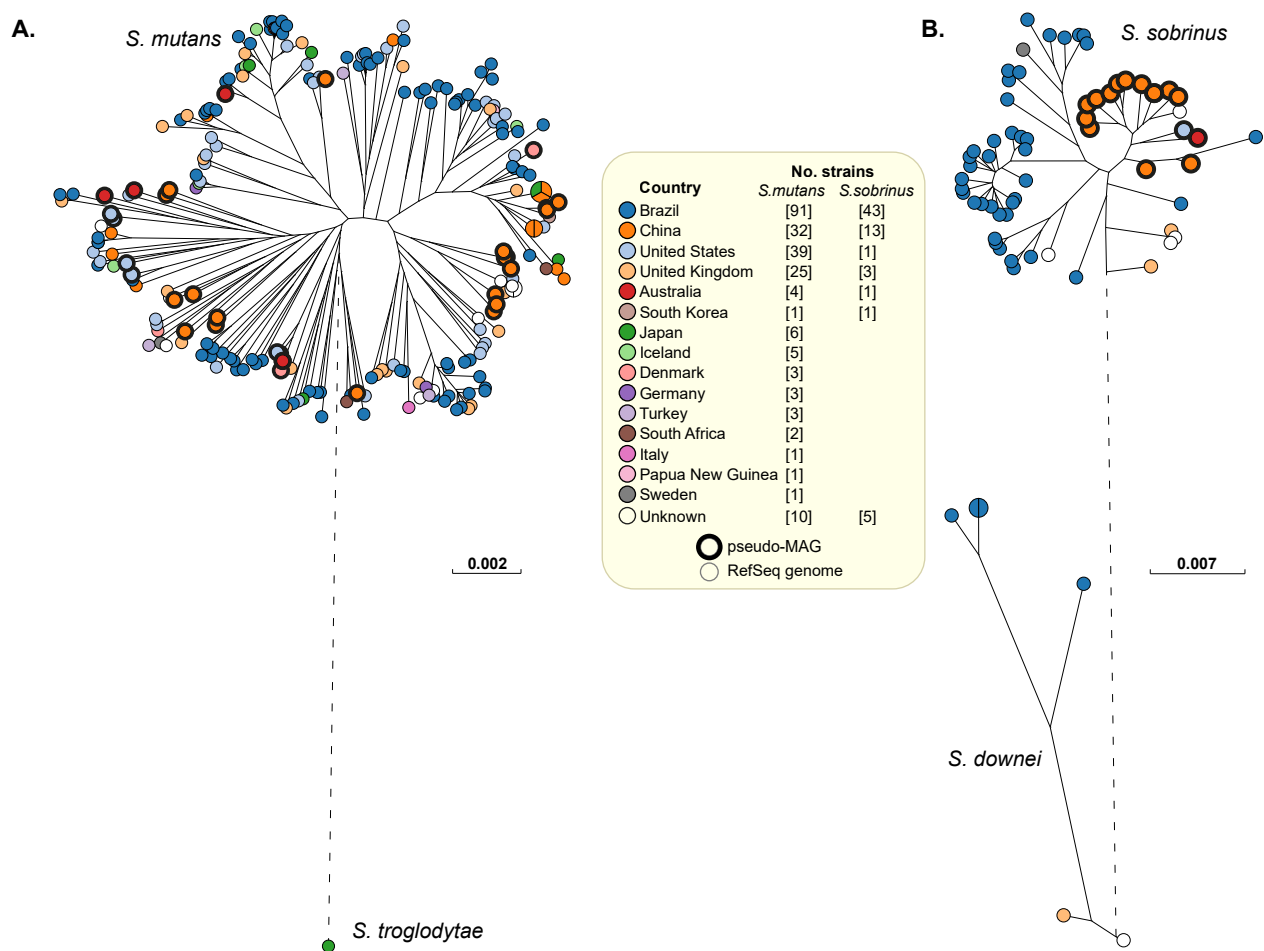

Source: https://www.biorxiv.org/content/10.1101/842542v2.full.pdf
